# Supplementary material
Source: MDPI journal article supplement (https://www.mdpi.com/2073-4352/7/2/57)
Supplement: s1 [file s1]

Supplementary Materials: Molecular Dynamics Simulations of Hydroxyapatite Nanopores in Contact with Electrolyte Solutions: The Effect of Nanoconfinement and Solvated Ions on The Surface Reactivity and The Structural, Dynamical and Vibrational Properties of Water

Devis Di Tommaso, Muthuramalingam Prakash, Thibault Lemaire, Marius Lewerenz, Nora H. de Leeuw and Salah Naili

S.1. Interatomic potential parameters

**Table S.1.1.** FIELD file used in DL_POLY containing the partial charges and potential parameters used to model hydroxyapatite–water (H = 60 Å).

HAP (H = 60 ANG) - WATER

UNITS EV

MOLECULES 4

PHOSPHATE

NUMMOLS 216

ATOMS 9

P 30.970000 1.180000 1

O2 15.800000 0.587000 1

O2 15.800000 0.587000 1

O2 15.800000 0.587000 1

O2 15.800000 0.587000 1

O2_S 0.200000 -1.632000 1

O2_S 0.200000 -1.632000 1

O2_S 0.200000 -1.632000 1

O2_S 0.200000 -1.632000 1

SHELL 4 1

#CORE-SHELL FOR PHOSPHATE OXYGEN (O) (4)

2 6 507.400000

3 7 507.400000

4 8 507.400000

5 9 507.400000

BONDS 12

#FOR P-0_CORE (4 BONDS)

MORS 1 2 3.470 1.600 2.030

MORS 1 3 3.470 1.600 2.030

MORS 1 4 3.470 1.600 2.030

MORS 1 5 3.470 1.600 2.030

#COULOMBIC SUBTRACTION FOR P_O_CORE AND P_O_SHELL (0%) (8 BONDS)

COUL 1 2 1.0

COUL 1 3 1.0

COUL 1 4 1.0

COUL 1 5 1.0

COUL 1 6 1.0

COUL 1 7 1.0

COUL 1 8 1.0

COUL 1 9 1.0

ANGLES 6

# FOR O_CORE-P-O_CORE

-HRM 2 1 3 1.322626 109.47

-HRM 2 1 4 1.322626 109.47

-HRM 2 1 5 1.322626 109.47

-HRM 3 1 4 1.322626 109.47

-HRM 3 1 5 1.322626 109.47

-HRM 4 1 5 1.322626 109.47

FINISH

HYDROXIDE

NUMMOLS 72

ATOMS 3

O1 15.800000 0.900000 1

O1_S 0.200000 -2.300000 1

H1 1.010000 0.400000 1

SHELL 1 1

#CORE-SHELL FOR HYDROXY OXYGEN (01) (1)

1 2 74.920380

BONDS 2

#FOR H - OH_SHELL

MORS 2 3 7.0525 0.9485 3.1749

#COULOMBIC SUBTRACTION FOR H_OH_SHELL (100%) AND H_O1_CORE (0%)

COUL 1 3 1.0

FINISH

CALCIUM

NUMMOLS 360

ATOMS 1

CA 40.080000 2.000000 1

SHELL 0

FINISH

SPC-E WATER

NUMMOLS 1363

ATOMS 3

OW 15.9994000 -0.84760000

HW 1.00797000 0.42380000

HW 1.00797000 0.42380000

CONSTRAINTS 3

1 2 1.00000000

1 3 1.00000000

2 3 1.63299000

FINISH

VDW 14

CA O2_S BUCK 1550.000000 0.297000 0.000000

CA O1_S BUCK 1250.000000 0.343700 0.000000

H1 O2_S BUCK 312.000000 0.250000 0.000000

H1 O1_S BUCK 312.000000 0.250000 0.000000

O2_S O2_S BUCK 16372.00000 0.213000 3.470000

O1_S O1_S BUCK 22764.00000 0.149000 6.970000

O2_S O1_S BUCK 22764.00000 0.149000 4.920000

CA OW BUCK 1237.000000 0.297000 0.000000

O1_S OW BUCK 21836.50000 0.149000 17.14000

O2_S OW BUCK 12022.60000 0.213000 12.09000

H1 OW BUCK 413.1000000 0.250000 0.000000

HW O1_S BUCK 325.300000 0.250000 0.000000

HW O2_S BUCK 413.100000 0.230000 0.000000

OW OW LJ 0.00673885 3.16900000

CLOSE

**Table S.1.2.** FIELD file used in DL_POLY containing the partial charges and potential parameters used to model hydroxyapatite–CaCl2 aqueous solution (H = 60 Å).

HAP (H = 60 ANG) – CACL2

UNITS EV

MOLECULES 6

PHOSPHATE

NUMMOLS 216

ATOMS 9

P 30.970000 1.180000 1

O2 15.800000 0.587000 1

O2 15.800000 0.587000 1

O2 15.800000 0.587000 1

O2 15.800000 0.587000 1

O2_S 0.200000 -1.632000 1

O2_S 0.200000 -1.632000 1

O2_S 0.200000 -1.632000 1

O2_S 0.200000 -1.632000 1

SHELL 4 1

#CORE-SHELL FOR PHOSPHATE OXYGEN (O) (4)

2 6 507.400000

3 7 507.400000

4 8 507.400000

5 9 507.400000

BONDS 12

#FOR P-0_CORE (4 BONDS)

MORS 1 2 3.470 1.600 2.030

MORS 1 3 3.470 1.600 2.030

MORS 1 4 3.470 1.600 2.030

MORS 1 5 3.470 1.600 2.030

#COULOMBIC SUBTRACTION FOR P_O_CORE AND P_O_SHELL (0%) (8 BONDS)

COUL 1 2 1.0

COUL 1 3 1.0

COUL 1 4 1.0

COUL 1 5 1.0

COUL 1 6 1.0

COUL 1 7 1.0

COUL 1 8 1.0

COUL 1 9 1.0

ANGLES 6

# FOR O_CORE-P-O_CORE

-HRM 2 1 3 1.322626 109.47

-HRM 2 1 4 1.322626 109.47

-HRM 2 1 5 1.322626 109.47

-HRM 3 1 4 1.322626 109.47

-HRM 3 1 5 1.322626 109.47

-HRM 4 1 5 1.322626 109.47

FINISH

HYDROXIDE

NUMMOLS 72

ATOMS 3

O1 15.800000 0.900000 1

O1_S 0.200000 -2.300000 1

H1 1.010000 0.400000 1

SHELL 1 1

#CORE-SHELL FOR HYDROXY OXYGEN (01) (1)

1 2 74.920380

BONDS 2

#FOR H - OH_SHELL

MORS 2 3 7.0525 0.9485 3.1749

#COULOMBIC SUBTRACTION FOR H_OH_SHELL (100%) AND H_O1_CORE (0%)

COUL 1 3 1.0

FINISH

CALCIUM

NUMMOLS 360

ATOMS 1

CA 40.080000 2.000000 1

SHELL 0

FINISH

SPC-E WATER

NUMMOLS 1351

ATOMS 3

OW 15.9994000 -0.84760000

HW 1.00797000 0.42380000

HW 1.00797000 0.42380000

CONSTRAINTS 3

1 2 1.00000000

1 3 1.00000000

2 3 1.63299000

FINISH

CALCIUM ION

NUMMOL 4

ATOMS 1

CA2 40.0780 2.00

FINISH

CHLORIDE ION

NUMMOL 8

ATOMS 1

CL 35.4530 -1.00

FINISH

VDW 23

CA O2_S BUCK 1550.000000 0.297000 0.000000

CA O1_S BUCK 1250.000000 0.343700 0.000000

H1 O2_S BUCK 312.000000 0.250000 0.000000

H1 O1_S BUCK 312.000000 0.250000 0.000000

O2_S O2_S BUCK 16372.00000 0.213000 3.470000

O1_S O1_S BUCK 22764.00000 0.149000 6.970000

O2_S O1_S BUCK 22764.00000 0.149000 4.920000

CA OW BUCK 1237.000000 0.297000 0.000000

O1_S OW BUCK 21836.50000 0.149000 17.14000

O2_S OW BUCK 12022.60000 0.213000 12.09000

H1 OW BUCK 413.1000000 0.250000 0.000000

HW O1_S BUCK 325.300000 0.250000 0.000000

HW O2_S BUCK 413.100000 0.230000 0.000000

CA2 OW BUCK 1237.000000 0.297000 0.000000

CA2 O2_S BUCK 1550.000000 0.297000 0.000000

CA2 O1_S BUCK 1250.000000 0.343700 0.000000

CL CL BUCK 49039.26000 0.243207 16.05

CL O1_S BUCK 71379.71000 0.227705 0.13

CL O2_S BUCK 68297092.09 0.153267 15.16

CL CA BUCK 1285.140000 0.348729 0.00000

CL CA2 BUCK 1285.140000 0.348729 0.00000

OW OW LJ 0.00673885 3.16900000

CL OW LJ 0.00540756 3.78500000

CLOSE

**Table S.1.3.** FIELD file used in DL_POLY containing the partial charges and potential parameters used to model hydroxyapatite–CaF2 aqueous solution (H = 60 Å).

HAP (H = 60 ANG) – CAF2

UNITS EV

MOLECULES 6

PHOSPHATE

NUMMOLS 216

ATOMS 9

P 30.970000 1.180000 1

O2 15.800000 0.587000 1

O2 15.800000 0.587000 1

O2 15.800000 0.587000 1

O2 15.800000 0.587000 1

O2_S 0.200000 -1.632000 1

O2_S 0.200000 -1.632000 1

O2_S 0.200000 -1.632000 1

O2_S 0.200000 -1.632000 1

SHELL 4 1

#CORE-SHELL FOR PHOSPHATE OXYGEN (O) (4)

2 6 507.400000

3 7 507.400000

4 8 507.400000

5 9 507.400000

BONDS 12

#FOR P-0_CORE (4 BONDS)

MORS 1 2 3.470 1.600 2.030

MORS 1 3 3.470 1.600 2.030

MORS 1 4 3.470 1.600 2.030

MORS 1 5 3.470 1.600 2.030

#COULOMBIC SUBTRACTION FOR P_O_CORE AND P_O_SHELL (0%) (8 BONDS)

COUL 1 2 1.0

COUL 1 3 1.0

COUL 1 4 1.0

COUL 1 5 1.0

COUL 1 6 1.0

COUL 1 7 1.0

COUL 1 8 1.0

COUL 1 9 1.0

ANGLES 6

# FOR O_CORE-P-O_CORE

-HRM 2 1 3 1.322626 109.47

-HRM 2 1 4 1.322626 109.47

-HRM 2 1 5 1.322626 109.47

-HRM 3 1 4 1.322626 109.47

-HRM 3 1 5 1.322626 109.47

-HRM 4 1 5 1.322626 109.47

FINISH

HYDROXIDE

NUMMOLS 72

ATOMS 3

O1 15.800000 0.900000 1

O1_S 0.200000 -2.300000 1

H1 1.010000 0.400000 1

SHELL 1 1

#CORE-SHELL FOR HYDROXY OXYGEN (01) (1)

1 2 74.920380

BONDS 2

#FOR H - OH_SHELL

MORS 2 3 7.0525 0.9485 3.1749

#COULOMBIC SUBTRACTION FOR H_OH_SHELL (100%) AND H_O1_CORE (0%)

COUL 1 3 1.0

FINISH

CALCIUM

NUMMOLS 360

ATOMS 1

CA 40.080000 2.000000 1

SHELL 0

FINISH

SPC-E WATER

NUMMOLS 1330

ATOMS 3

OW 15.9994000 -0.84760000

HW 1.00797000 0.42380000

HW 1.00797000 0.42380000

CONSTRAINTS 3

1 2 1.00000000

1 3 1.00000000

2 3 1.63299000

FINISH

CALCIUM ION

NUMMOL 11

ATOMS 1

CA2 40.0780 2.00

FINISH

FLUOORIDE ION

NUMMOL 22

ATOMS 1

F2 18.9984 -1.00

FINISH

VDW 23

CA O2_S BUCK 1550.000000 0.297000 0.000000

CA O1_S BUCK 1250.000000 0.343700 0.000000

H1 O2_S BUCK 312.000000 0.250000 0.000000

H1 O1_S BUCK 312.000000 0.250000 0.000000

O2_S O2_S BUCK 16372.00000 0.213000 3.470000

O1_S O1_S BUCK 22764.00000 0.149000 6.970000

O2_S O1_S BUCK 22764.00000 0.149000 4.920000

CA OW BUCK 1237.000000 0.297000 0.000000

O1_S OW BUCK 21836.50000 0.149000 17.14000

O2_S OW BUCK 12022.60000 0.213000 12.09000

H1 OW BUCK 413.1000000 0.250000 0.000000

HW O1_S BUCK 325.300000 0.250000 0.000000

HW O2_S BUCK 413.100000 0.230000 0.000000

CA2 OW BUCK 1237.000000 0.297000 0.000000

CA2 O2_S BUCK 1550.000000 0.297000 0.000000

CA2 O1_S BUCK 1250.000000 0.343700 0.000000

CA2 F2 BUCK 1272.8000000 0.2997 0.000000

CA F2 BUCK 1272.8000000 0.2997 0.000000

F2 F2 BUCK 99731834.000 0.12013 17.02423

F2 O2_S BUCK 583833.70000 0.21163 7.6800

F2 O1_S BUCK 35000.000000 0.17500 15.400

F2 OW LJ 0.00725292 3.14300000

OW OW LJ 0.00673885 3.16900000

CLOSE

S.2. Forcefield validation

Diffusion of water within hydroxyapatite nanopores

MD simulations were conducted at the temperatures of 288, 298, 310 and 323 K to determine the activation energy for water diffusion in HAP nanopores with H = 60 Å and H = 110 Å, which are representative of typical nanopores in bones (50 Å < H < 125 Å) [1]. The Arrhenius plots of the diffusion coefficient of water versus the inverse of the temperature for the HAP-water systems with pore sizes equal to 60 Å and 110 Å are reported in the Figure S2.1 below. The linear fit of these points using Arrhenius equation, ln(Ds) = ln(D0) − Ea/(RT), gives activation energies equal to 22.5 ±0.7 kJ/mol for H = 60 Å and 21.5 ±2.0 kJ/mol for H = 110 Å. These values are both in close agreement with the experimental activations energies of water diffusion in cortical bone (Ea = 26.6 kJ/mol) and intertubular dentine (Ea = 29.5 kJ/mol) obtained using NMR measurements [2].

**
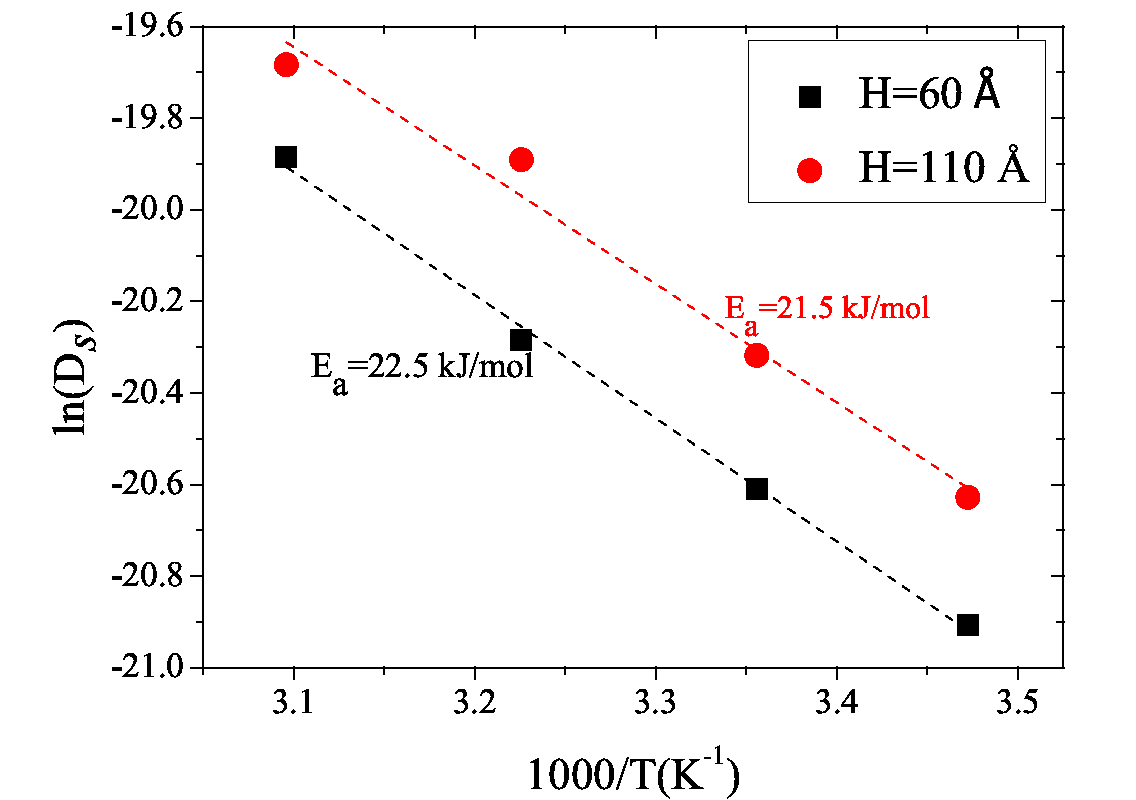
**

**Figure S.2.1.** Arrhenius plots of the average diffusion coefficient of water *versus* the inverse of the temperature for the HAP-water systems with pore sizes equal to 60 Å and 110 Å where H is the initial height of the nanopore.

Effect of electrolytes to the structural and dynamical properties of water in bulk solutions

MD simulations of aqueous CaCl2 solutions and aqueous CaFl2 solutions were conducted using the two following sets of potential parameters:

SPC/E–Dang–de Leeuw forcefield

Ca–O: Buckingham potential parameterized by de Leeuw and Parker [3,4].

Cl–O: Lennard-Jones potential parameterized by Dang and Smith [5].

Ca–Cl: Lennard-Jones potential with parameters derived using Lorentz–Barthelot combining rules to the Lennard-Jones Ca–O and Cl–O parameters of Dang and Smith [5].

Ca–F: Lennard-Jones potential with parameters derived using Lorentz–Barthelot combining rules to the Lennard-Jones Ca–O and Cl–O parameters of Dang and Smith [5].

Cl–Cl: Lennard-Jones potential parameterized by Dang and Smith [5].

F–F: Lennard-Jones potential parameterized by Dang and Smith [5].

O–O: SPC/E potential [6].

SPC/E–Rabone–de Leeuw forcefield

Ca–O: Buckingham potential parameterized by de Leeuw and Parker [3,4].

Cl–O: Lennard-Jones potential parameterized by Dang and Smith [5].

F–O: Lennard-Jones potential parameterized by Dang and Smith [5].

Ca–Cl: Buckingham potential parameterized by Rabone and de Leeuw [7].

Ca–F: Buckingham potential parameterized by Rabone and de Leeuw [7].

Cl–Cl: Buckingham potential parameterized by Rabone and de Leeuw [7].

F–F: Buckingham potential parameterized by Rabone and de Leeuw [7].

O–O: SPC/E potential [6].

The *SPC/E–Dang–de Leeuw* model comprises potentials to describe ion-ion and ion-water interactions that have been extensively applied to simulate the statistics and dynamics of HBs of aqueous electrolyte solutions, the hydration structure, mobility and pairing of alkali and halide ions in aqueous solutions [8-14].

In the *SPC/E–Rabone–de Leeuw* forcefield the Ca–Cl and Cl–Cl interactions are described using the Buckingham potentials developed by Rabone and de Leeuw for hydroxyapatite. This interaction model potential was considered consistent with the forcefield used to describe HAP and its interaction with water

Figure S.2.2 reports the oxygen–oxygen (O–O) radial distribution function (RDF) of aqueous solutions at increasing concentrations of CaCl2 and CaF2. Table S.2.1 lists the water self-diffusion coefficients in pure bulk water and calcium halide solutions. Tables S.2.2 and S.2.3 compares the hydrogen bonding statistics in pure water and electrolyte solutions. Table S.2.4 reports thenumber of accounted water exchange events (Nex) in the hydration shell of the calcium ions with a duration of more than 0.5 ps.

| 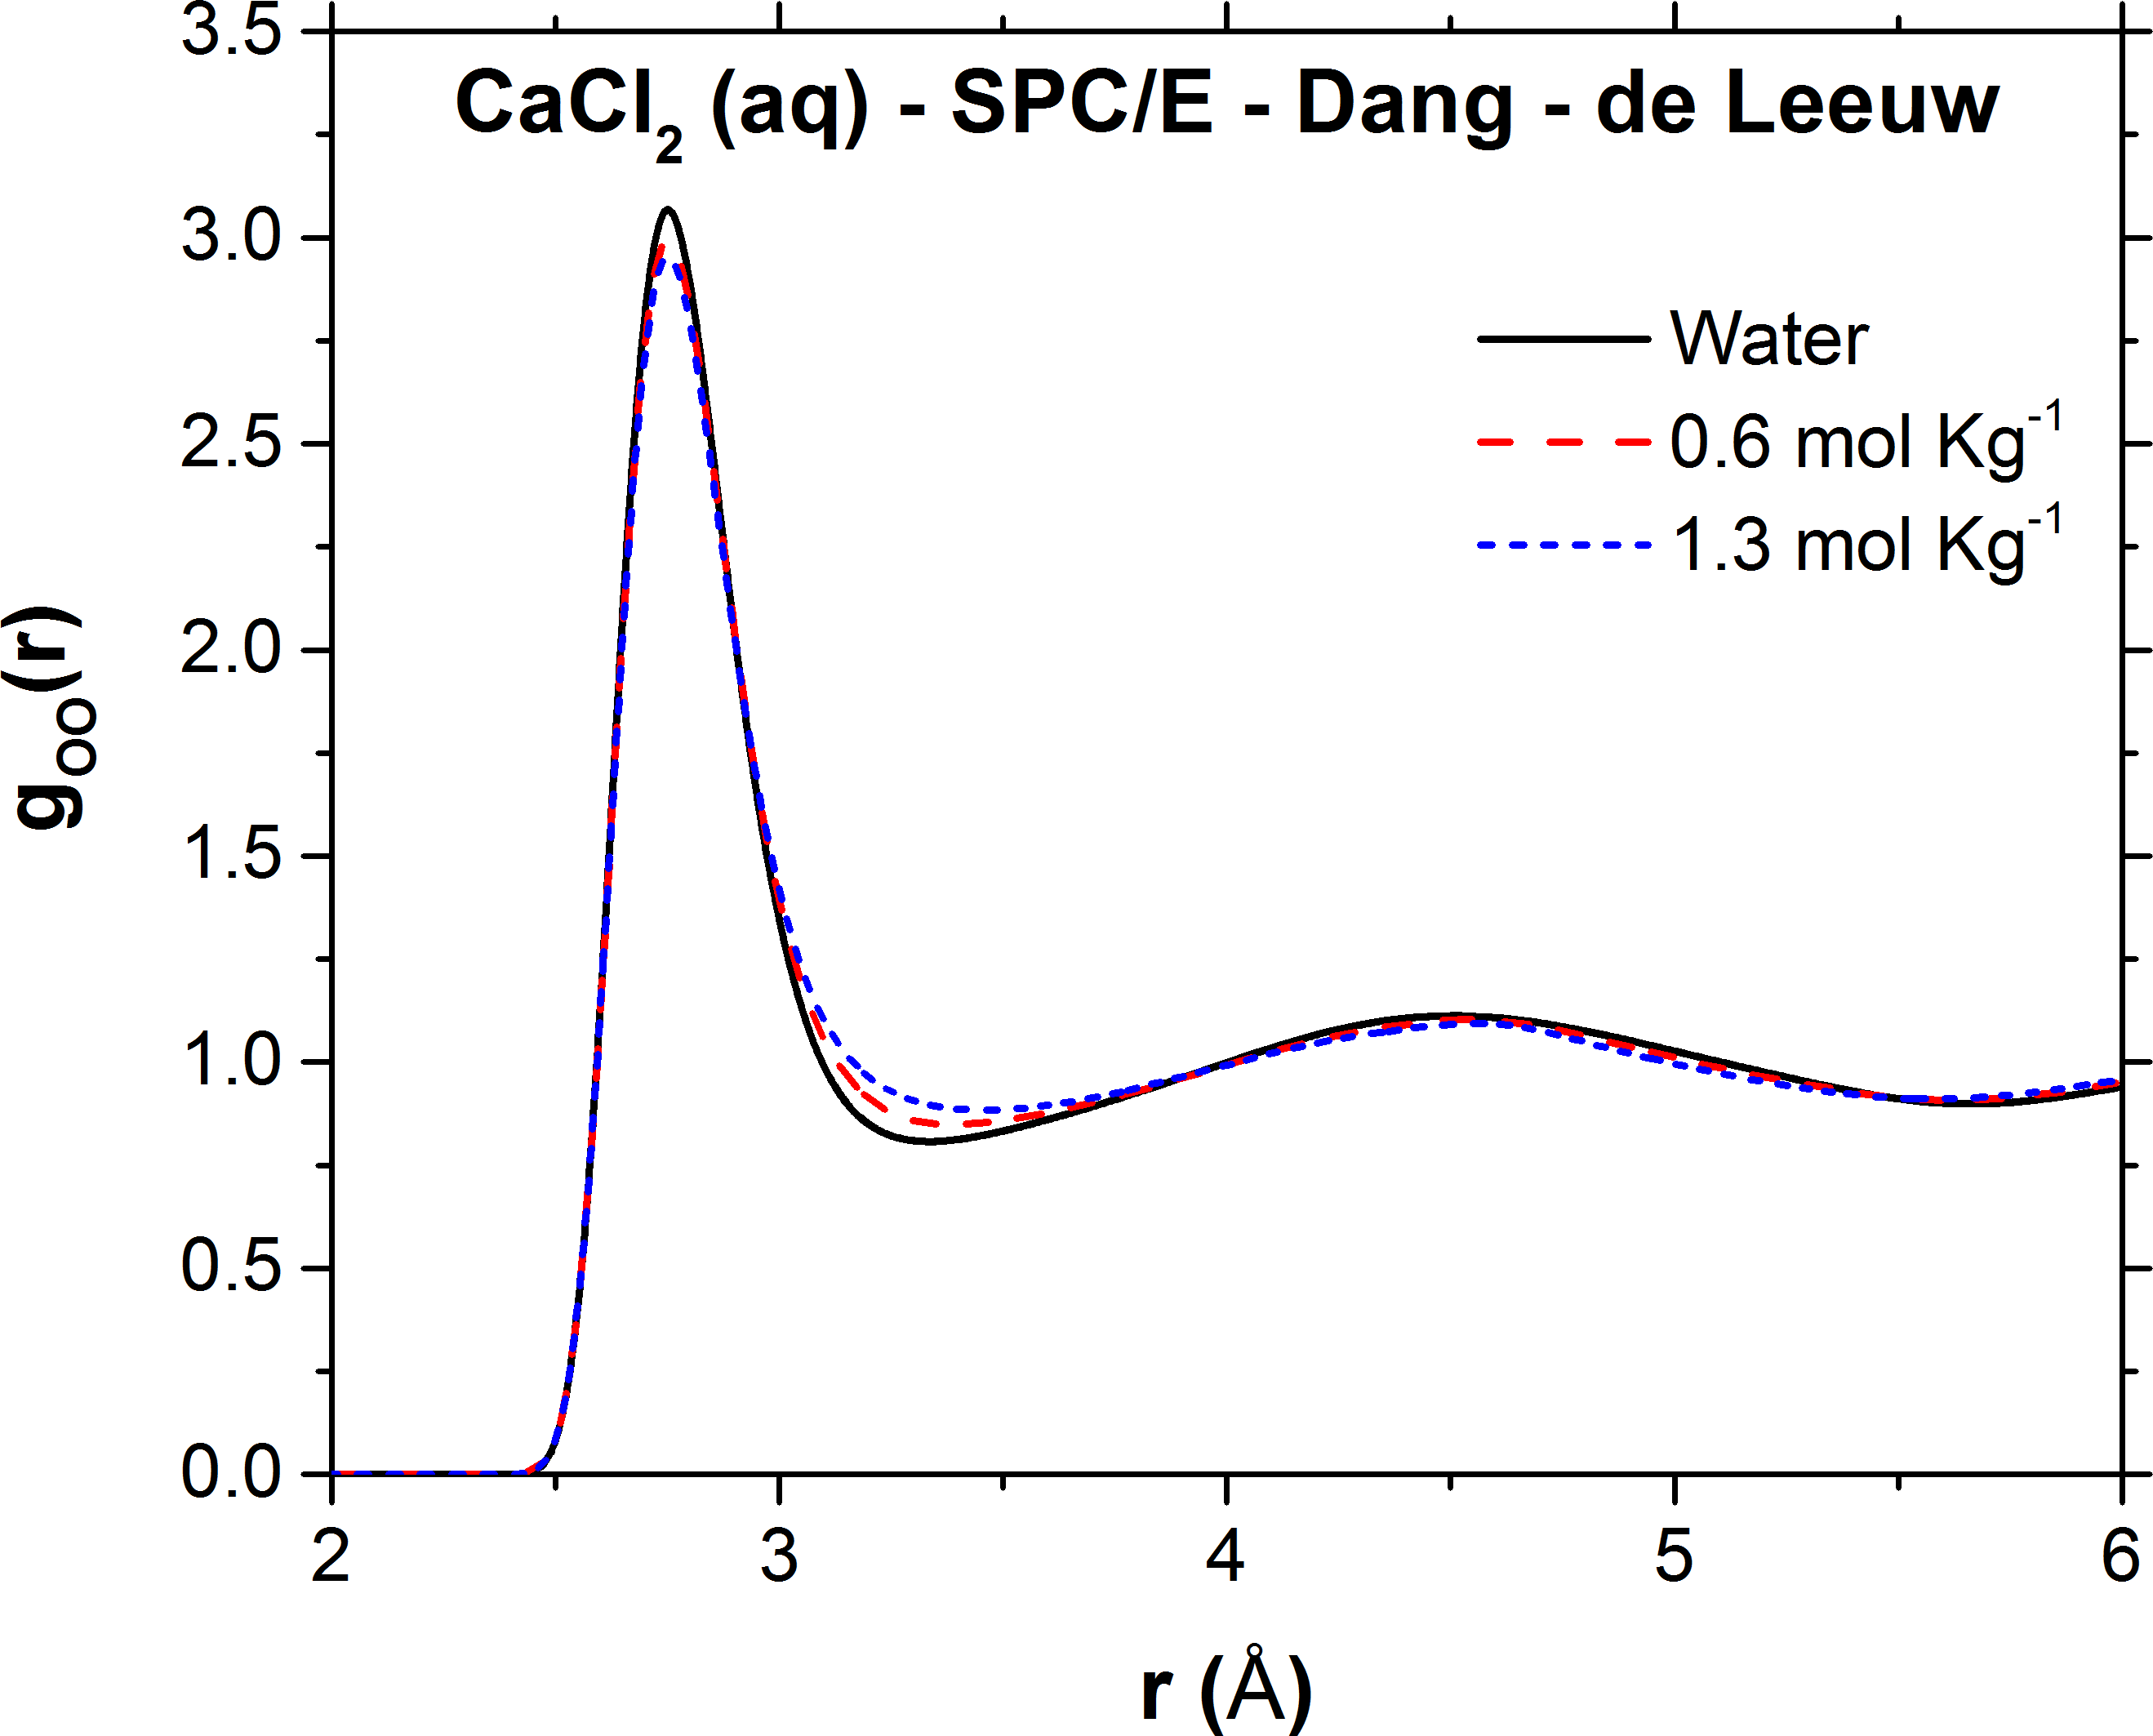 | 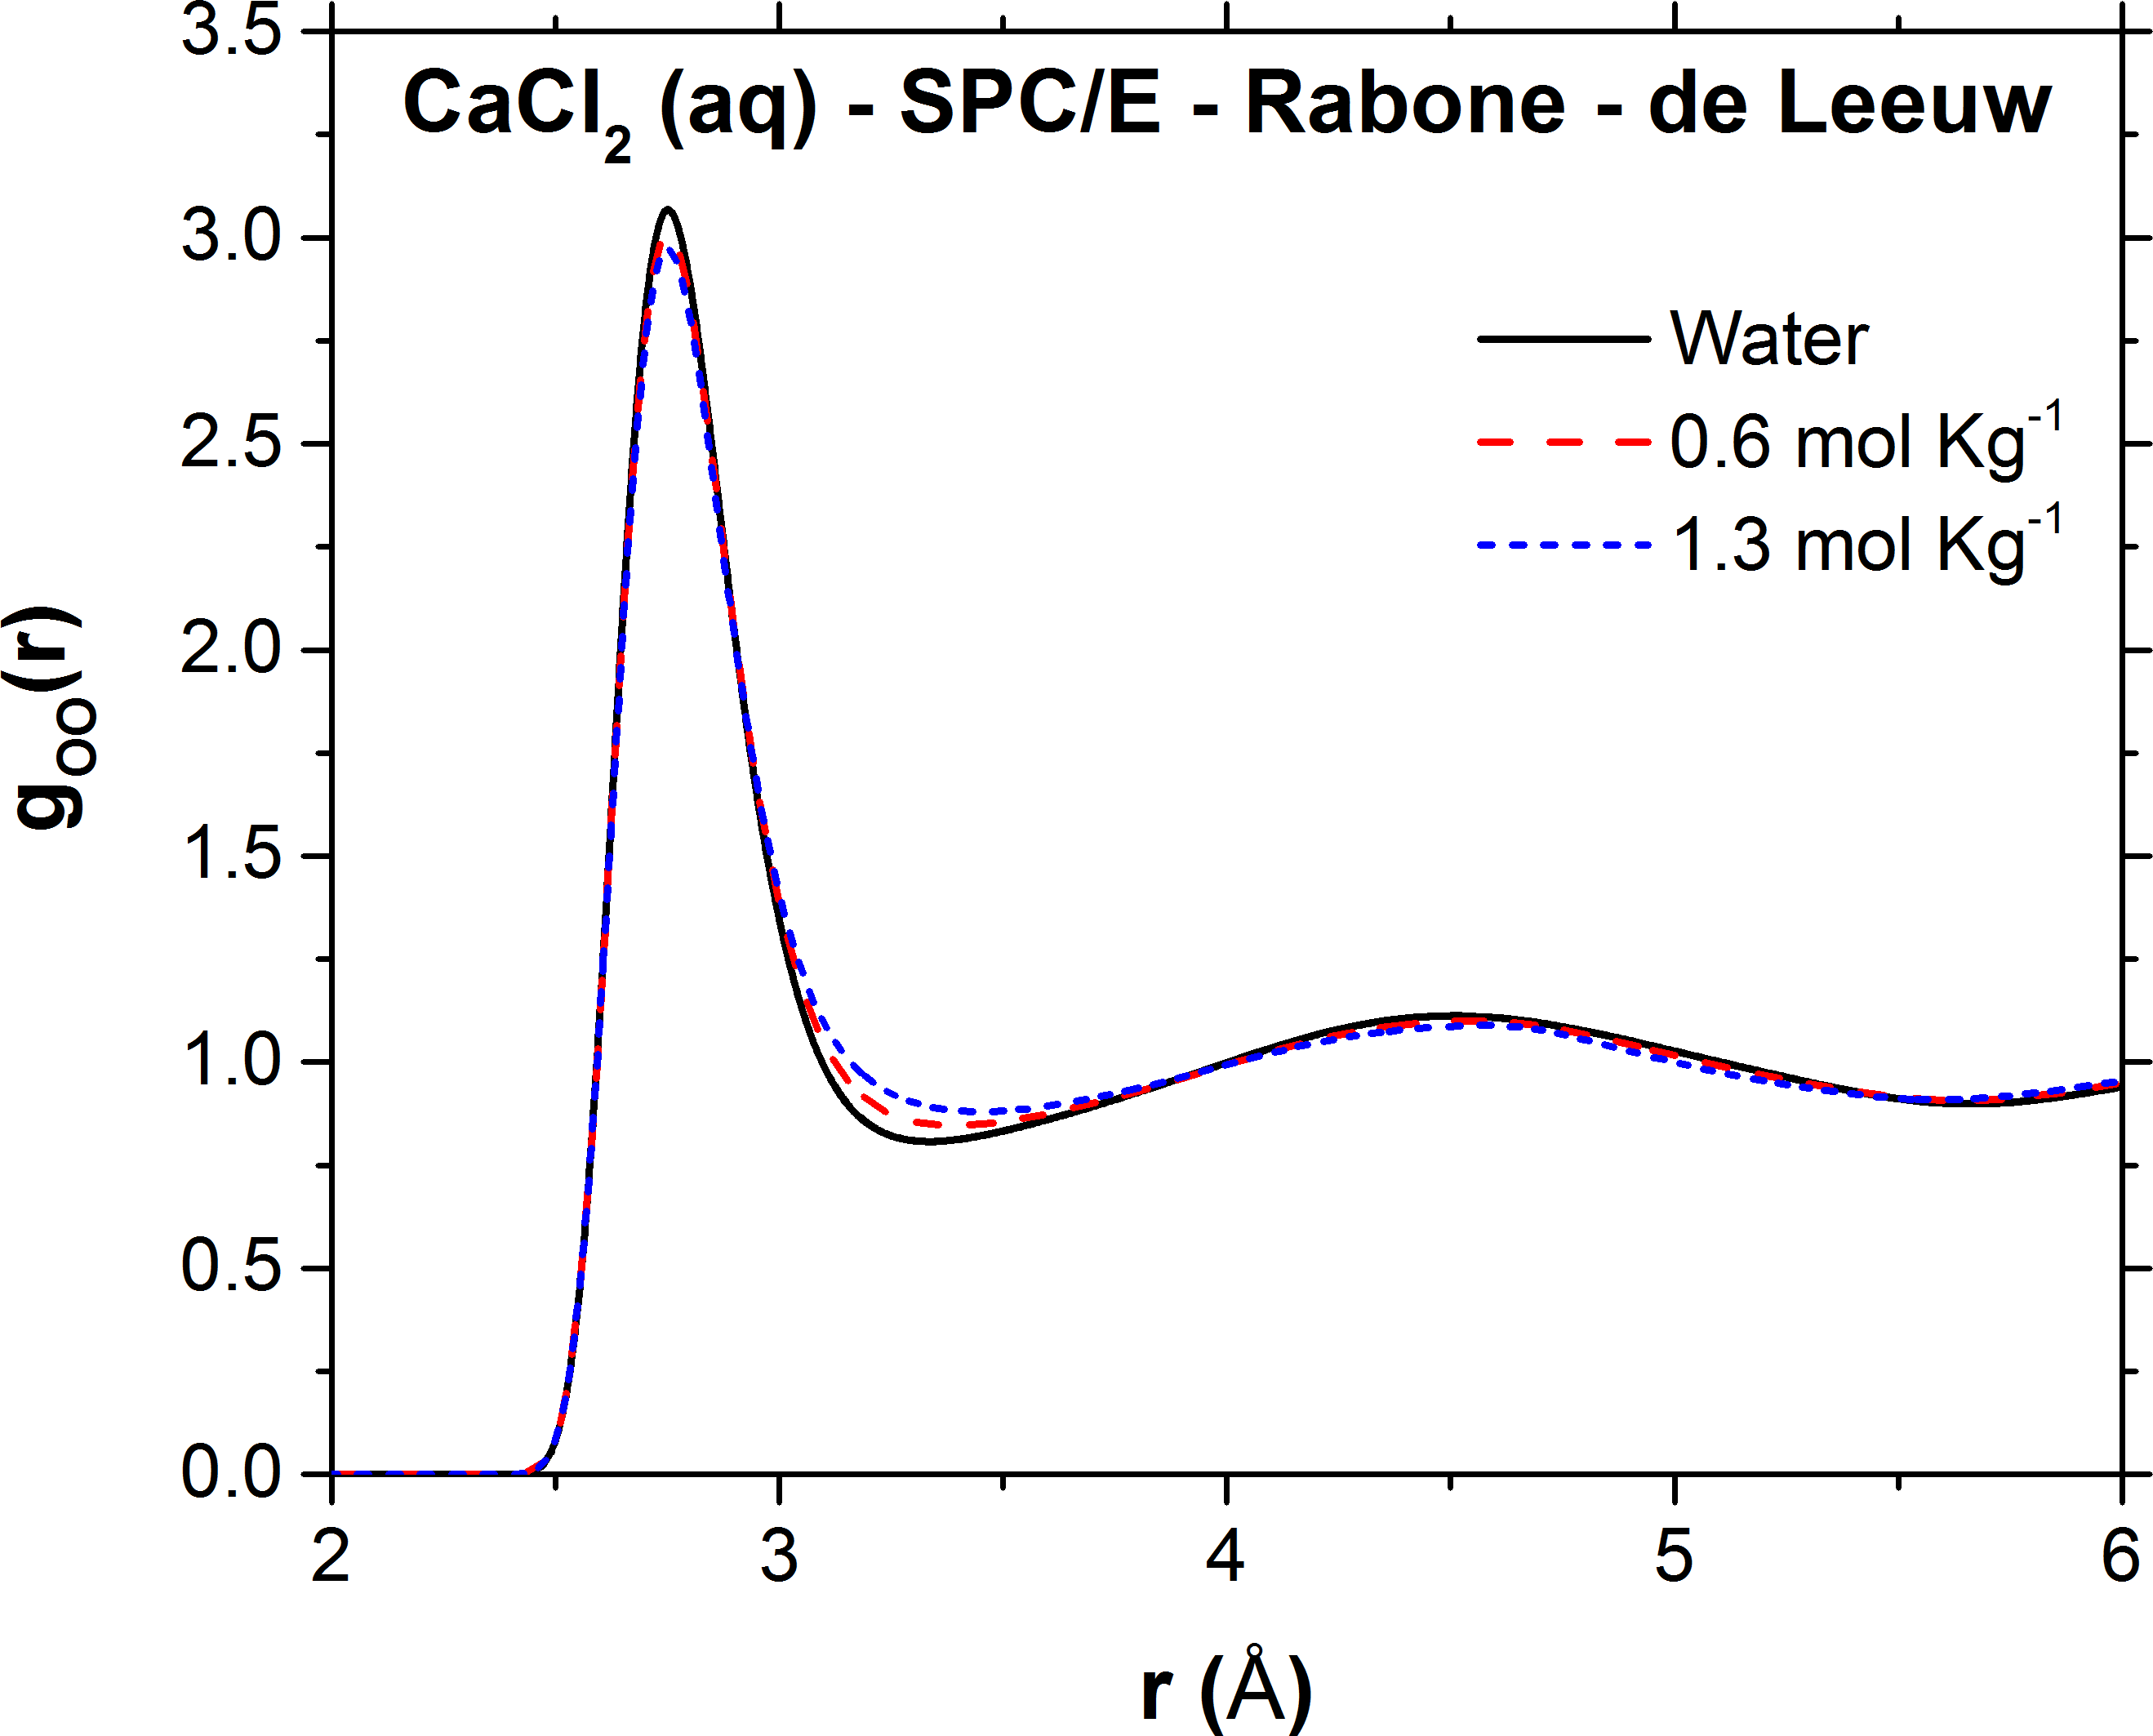 |
| --- | --- |
| 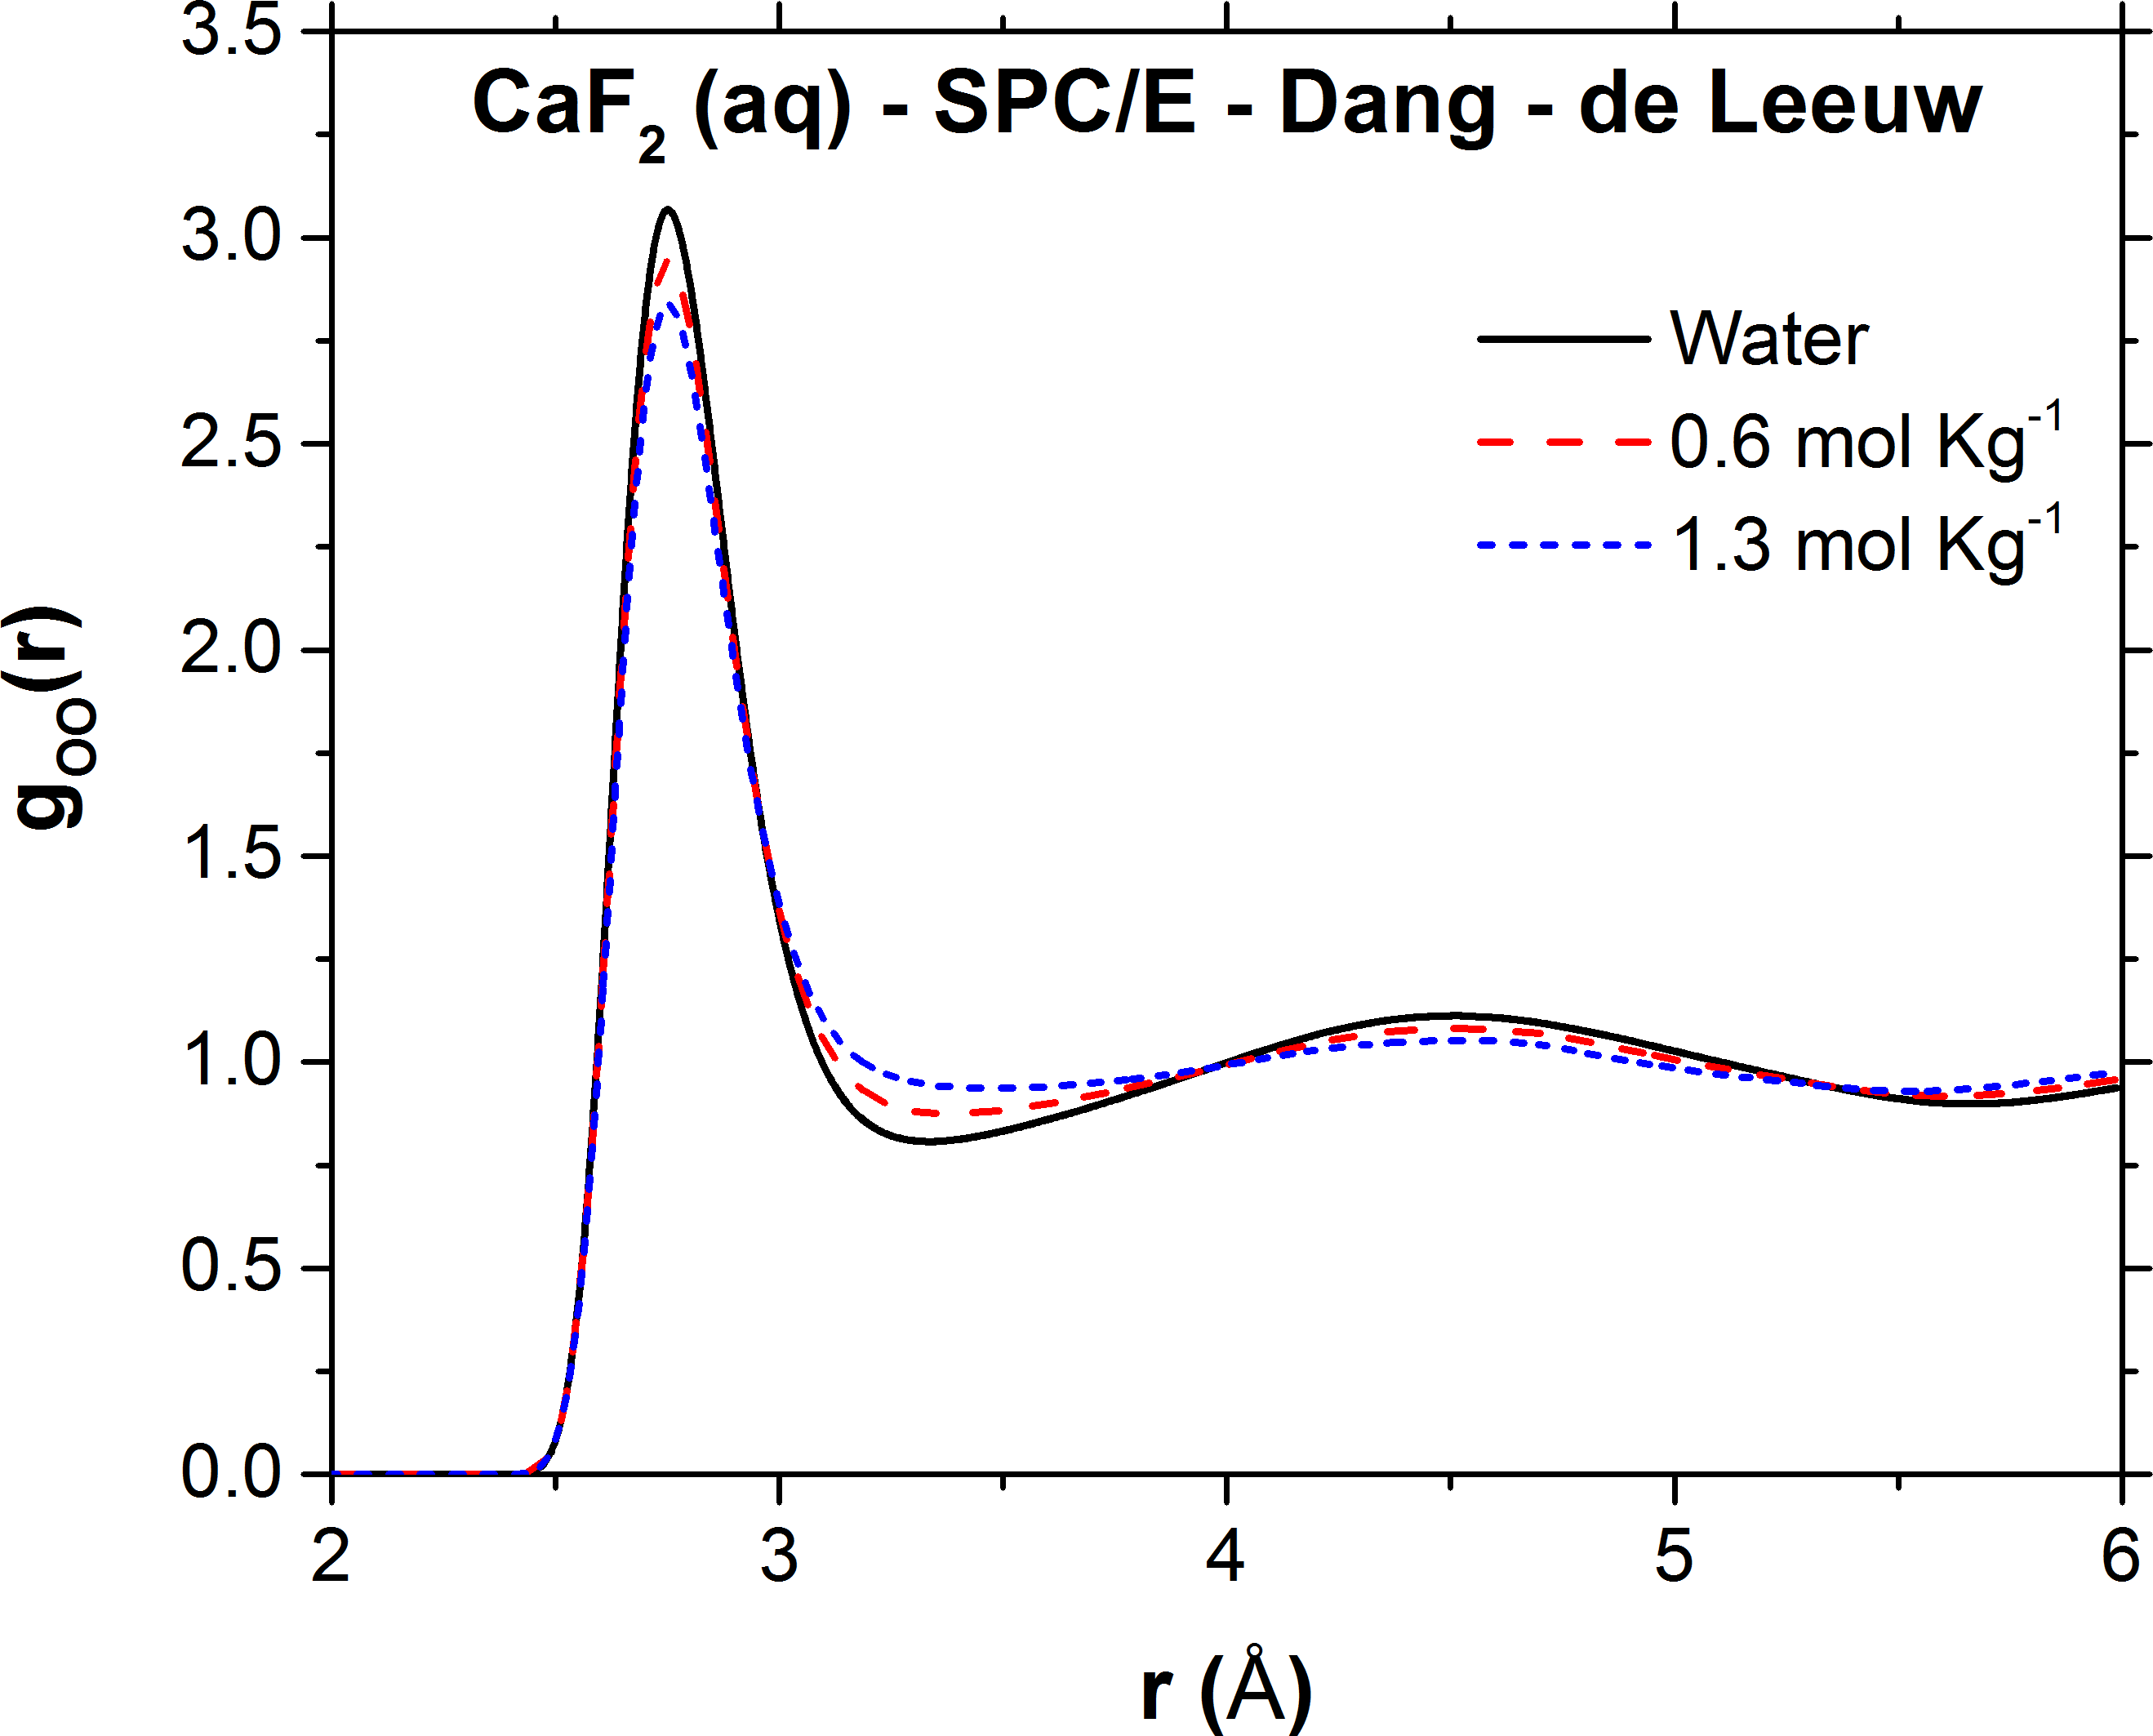 | **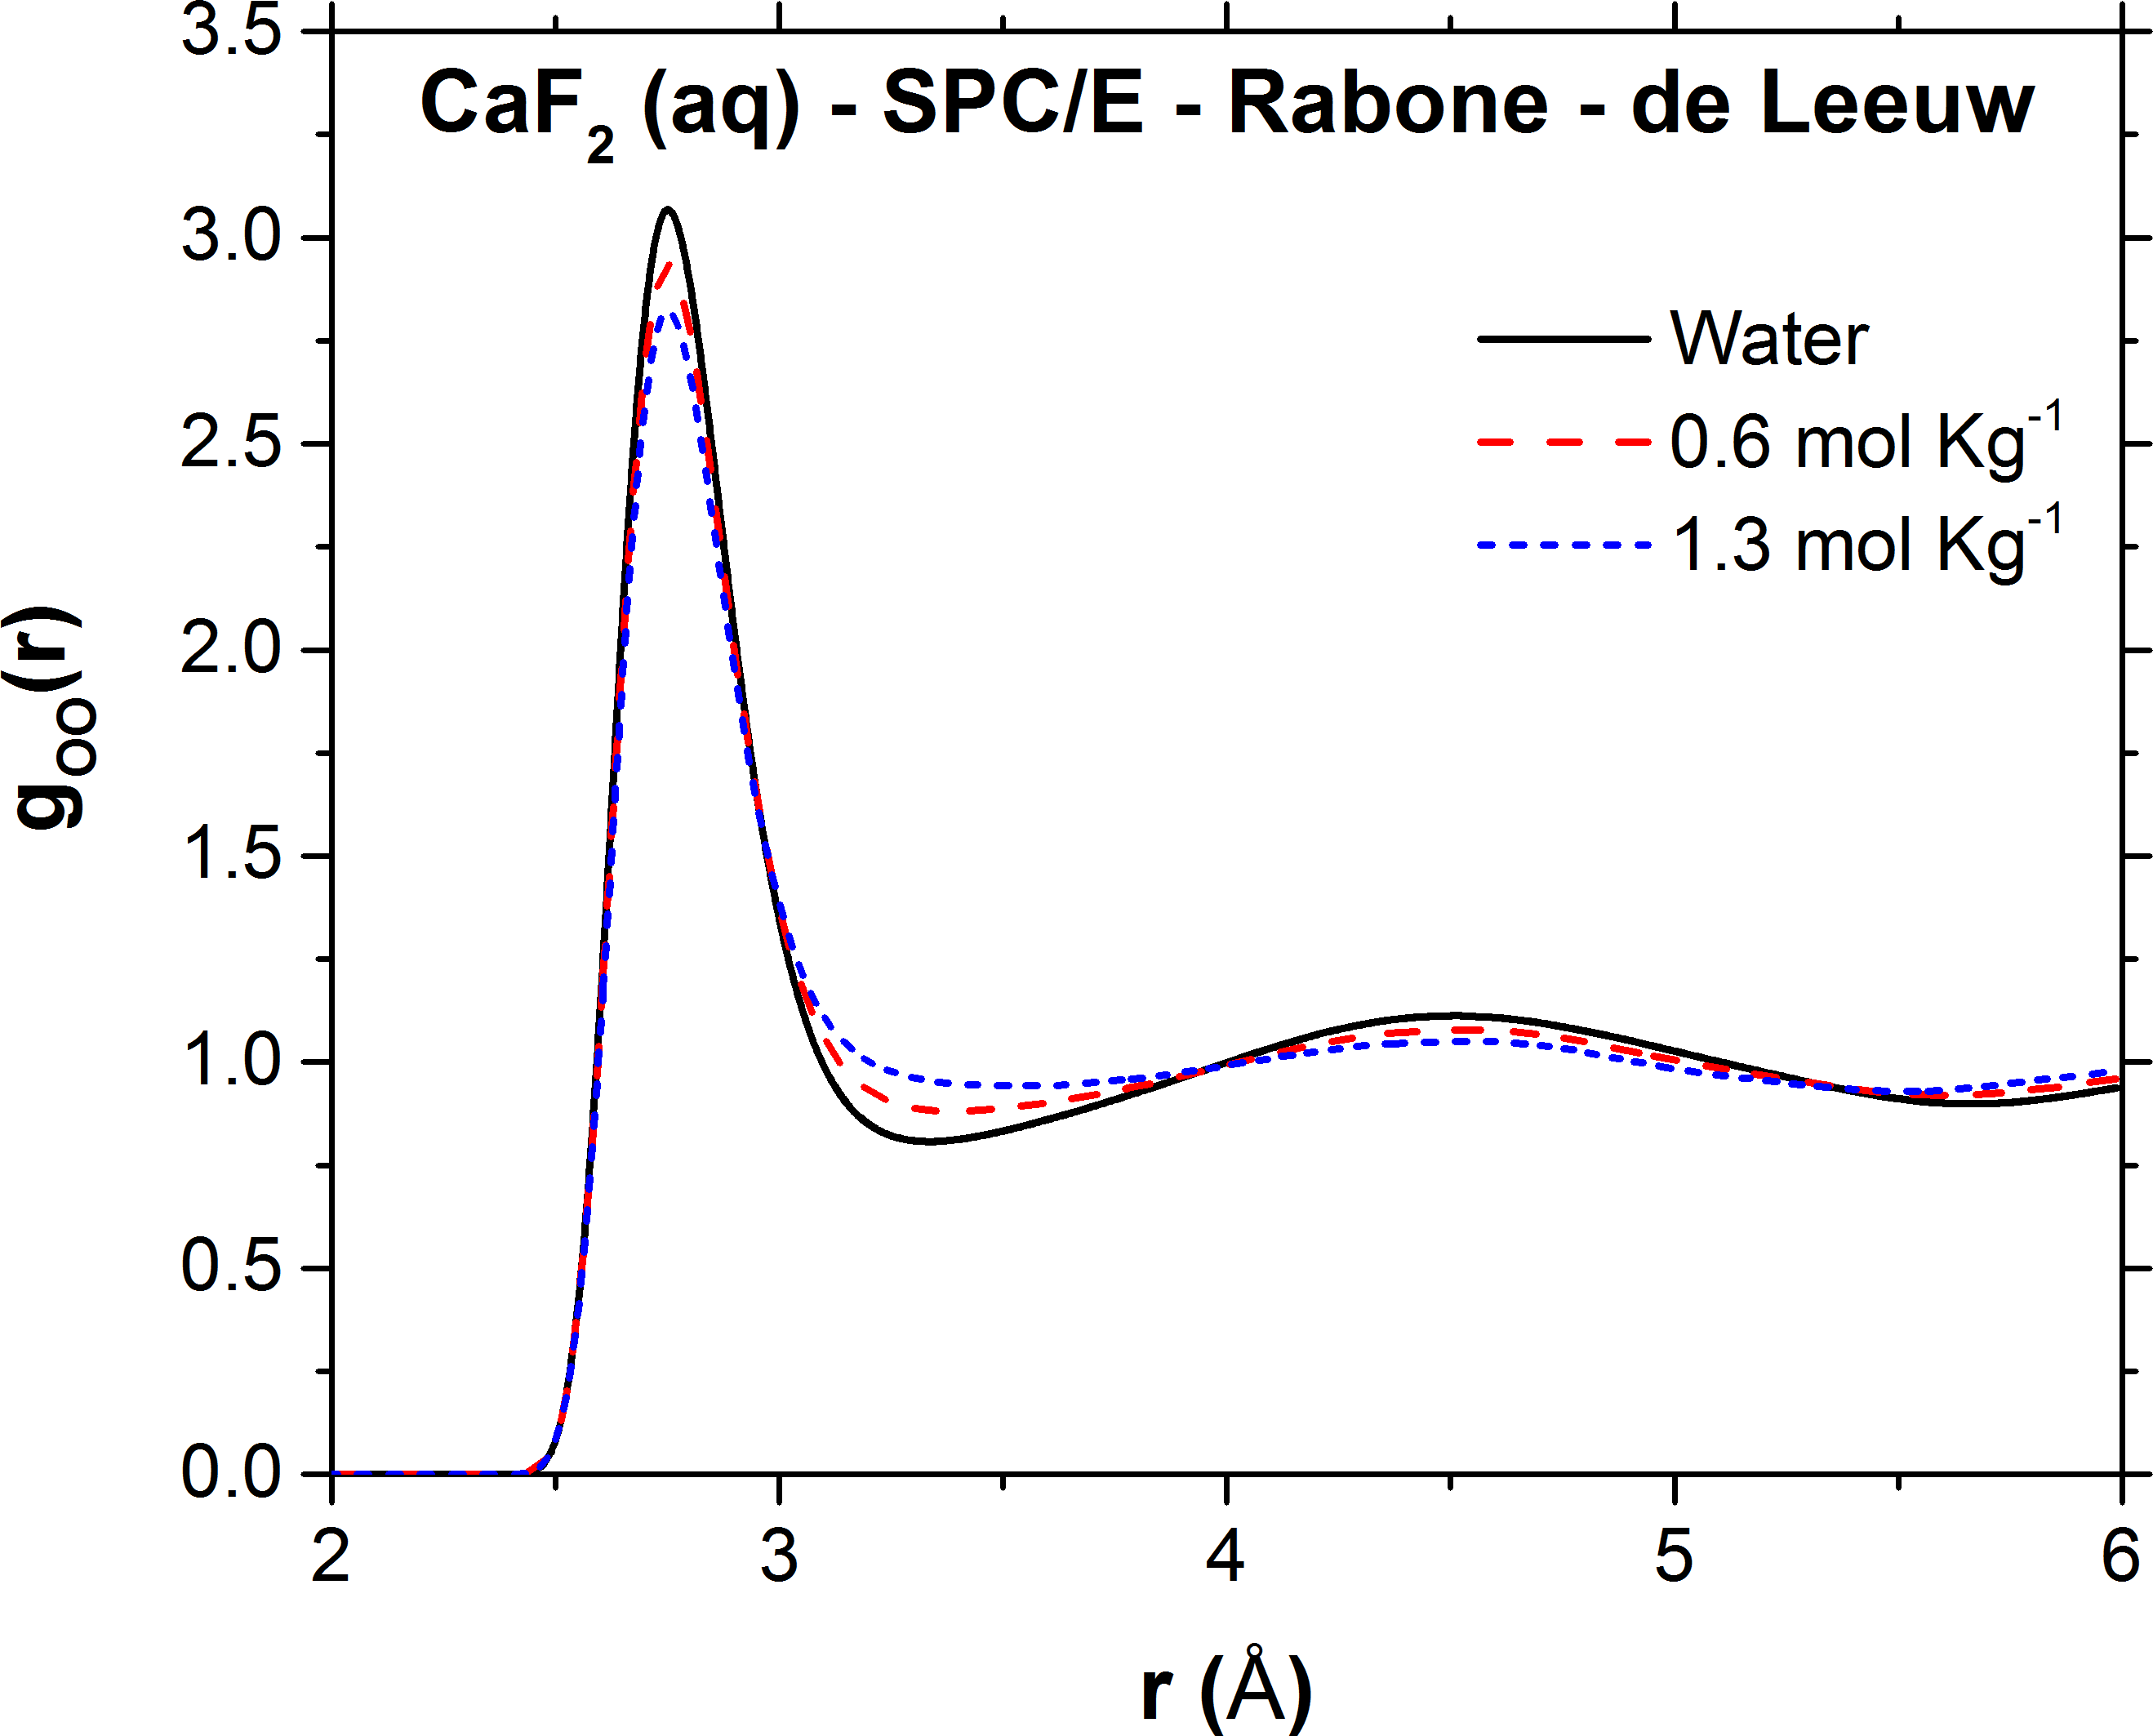** |

**Figure S.2.2.** Oxygen–oxygen radial distribution functions [gOO(r)].

**Table S.2.1.** The self-diffusion coefficient for bulk and confined water (DW). Concentration of calcium chloride and calcium fluoride (b) in mol.kg-1. Analysis based on 8 ns of simulations.

|  | ***b*** | **D*W* × 10–10 (m2.s-1)** | |
| --- | --- | --- | --- |
|  |  | SPC/E–Dang–de Leeuw | SPC/E–Rabone–de Leeuw |
| Water | – | 25.8 | |
| CaCl2 | 0.6 | 22.8 | 21.1 |
|  | 1.3 | 17.7 | 16.3 |
| CaF2 | 0.6 | 20.8 | 22.3 |
|  | 1.3 | 18.1 | 17.1 |

**Table S.2.2.** The distribution of the number of hydrogen bonds per water molecule. Results obtained from molecular dynamics simulations of bulk water, aqueous CaCl2 solutions and aqueous CaF2 solutions using the *SPC/E–Dang–de Leeuw* forcefield. The values given are percentages of molecules with the given number of hydrogen bonds. Concentration (*b*) in mol.kg-1.

|  | ***b*** | **Number of hydrogen bonds (%)** | | | | | | **Average** |
| --- | --- | --- | --- | --- | --- | --- | --- | --- |
|  |  | **0** | **1** | **2** | **3** | **4** | **5** |  |
| Water | – | 0.0 | 0.9 | 8.8 | 33.0 | 51.3 | 5.9 | 3.53 |
| CaCl2 | 0.6 | 0.2 | 3.1 | 15.5 | 34.0 | 42.4 | 4.7 | 3.30 |
|  | 1.3 | 0.5 | 5.4 | 20.0 | 33.9 | 36.3 | 3.9 | 3.12 |
| CaF2 | 0.6 | 0.2 | 2.6 | 13.1 | 33.4 | 45.2 | 5.3 | 3.37 |
|  | 1.3 | 0.7 | 4.6 | 15.9 | 33.0 | 40.9 | 0.1 | 3.24 |

**Table S.2.3.** The distribution of the number of hydrogen bonds per water molecule. Results obtained from molecular dynamics simulations of bulk water, aqueous CaCl2 solutions and aqueous CaF2 solutions using the *SPC/E–Rabone–de Leeuw* forcefield. The values given are percentages of molecules with the given number of hydrogen bonds. Concentration (*b*) in mol.kg-1.

|  | ***b*** | **Number of hydrogen bonds (%)** | | | | | | **Average** |
| --- | --- | --- | --- | --- | --- | --- | --- | --- |
|  |  | **0** | **1** | **2** | **3** | **4** | **5** |  |
| Water | – | 0.0 | 0.9 | 8.8 | 33.0 | 51.3 | 5.9 | 3.53 |
| CaCl2 (aq) | 0.6 | 0.2 | 2.7 | 14.5 | 34.0 | 43.7 | 4.8 | 3.30 |
|  | 1.3 | 0.4 | 4.7 | 19.2 | 34.0 | 37.6 | 4. | 3.16 |
| CaF2 (aq) | 0.6 | 0.2 | 2.8 | 13.5 | 33.4 | 44.7 | 5.3 | 3.36 |
|  | 1.3 | 0.5 | 4.7 | 17.1 | 33.1 | 39.6 | 4.8 | 3.21 |

**Table S.2.4.** Number of accounted water exchange events (Nex) in the hydration shell of the calcium ions with a duration of more than 0.5 ps. Values of Nex normalized with respect to the number of calcium ions in solution. Concentration (*b*) in mol.kg-1.

|  | **tsim (ps)** | **Nex** | **Nex / 10 ps** |
| --- | --- | --- | --- |
| Ca2+ in water | 8000 | 1532 | 1.9 |

|  | ***b*** | ***SPC/E–D–dL*** | |  | ***SPC/E–R–dL*** | | |
| --- | --- | --- | --- | --- | --- | --- | --- |
|  |  | tsim (ps) | Nex | Nex / 10 ps | tsim (ns) | Nex | Nex / 10 ps |
| CaCl2 (aq) | 0.6 | 8000 | 372.5 | 0.5 | 8000 | 396.8 | 0.5 |
|  | 1.3 | 8000 | 203.6 | 0.3 | 8000 | 225.1 | 0.3 |
| CaF2 (aq) | 0.6 | 8000 | 473.0 | 0.6 | 8000 | 308.1 | 0.4 |
|  | 1.3 | 8000 | 414.2 | 0.5 | 8000 | 202.5 | 0.3 |

The MRT of water in the coordination shell of hydrated Ca2+ was computed using the expression

where is the simulation time, is the average number of the first coordination shell around the ion (7.2) and is the number of water exchanges between the first and second coordination shell of calcium. With the SPC/E–de Leeuw potential he value of MRT of water in the first coordination shell of calcium ion is 32.3 ps, which is in good agreement with the value computed by means of *ab initio* (Hartree-Fock) QM/MM (42.5 ps) [15] and Car-Parrinello (23.2 ps) [16] molecular dynamics techniques.

Reference

1. Holmes, J.; Davies, D.; Meath, W.; Beebe, R. *Biochem.* **1964**, *3*, 2019–2024.
2. Fernández-Seara, M. A.; Wehrli, S. L.; Wehrli, F. W. *Biophys. J.* **2002**, *82*, 522–529.
3. de Leeuw, N. H.; Parker, S. C. *J. Chem. Phys.* 2000, **112**, 4326–4333.
4. de Leeuw, N. H.; Parker, S. C. *J. Chem. Soc., Faraday* *Trans.* **1997**, *93*, 467–475.
5. Dang, L. X.; Smith, D. E.  *J. Chem. Phys.*, 1995, **102**, 3483–3484.
6. Berendsen, H. J. C.; Grigera, J. R.; Straatsma, T. P. *J. Phys. Chem.* **1987**, *91*, 6269-6271.
7. Rabone, J. A. L.; N. H. de Leeuw *J. Comput. Chem.* **2006**, *27*, 253–266.
8. Dang, L. X. *J. Am. Chem. Soc.* **1995**, *117*, 6954–6960.
9. Koneshan, S.; Rasaiah, J. C.; Lynden-Bell, R. M.; Lee, S. H. *J. Phys. Chem. B* **1998**, *102*, 4193–4204.
10. Chowdhuri, S.; Chandra, A. *J. Chem. Phys.* **2003**, *118*, 9719–9725.
11. Chandra, A. *Phys. Rev. Lett.* **2000**, *85*, 768–771.
12. Fennell, C. J.; Bizjak, A.; Vlachy, V.; Dill, K. A.; Sarupria, S.; Rajamani, S.; Garde, S. *J. Phys. Chem. B* **2009**, *113*, 14837–14838.
13. S. H. Lee and J. C. Rasaiah, J. Phys. Chem. **1996**, *100*, 1420–1425.
14. Di Tommaso, D.; Ruiz-Agudo, E.; de Leeuw, N. H.; Putnis, A.; Putnis, C. V. *Phys. Chem. Chem. Phys.* **2014**, *16*, 7772-7785.
15. Hofer, T. S.; Tran, H. T.; Schwenk, C. F.; Rode, B. M. *J. Comput. Chem.* **2004**, *25*, 211–217.
16. Di Tommaso D.; de Leeuw, N. H. *Cryst. Growth Des.* **2010**, 10, 4292-4302.

© 2017 by the authors; licensee MDPI, Basel, Switzerland. This article is an open access article distributed under the terms and conditions of the Creative Commons by Attribution (CC BY) license (http://creativecommons.org/licenses/by/4.0/).
